## CORRECTION

# Spontaneous hair cell regeneration in the neonatal mouse cochlea *in vivo*

**Brandon C. Cox<sup>1,2,\*</sup>, Renjie Chai<sup>3,4,\*</sup>, Anne Lenoir<sup>1,5</sup>, Zhiyong Liu<sup>1,6</sup>, LingLi Zhang<sup>1</sup>, Duc-Huy Nguyen<sup>3</sup>, Kavita Chalasani<sup>3</sup>, Katherine A. Steigelman<sup>1,6</sup>, Jie Fang<sup>1</sup>, Edwin W. Rubel<sup>7</sup>, Alan G. Cheng<sup>3,‡</sup> and Jian Zuo<sup>1,‡</sup>**

<sup>1</sup>Department of Developmental Neurobiology, St. Jude Children's Research Hospital, Memphis, TN 38105, USA. <sup>2</sup>Department of Pharmacology, Southern Illinois University School of Medicine, Springfield, IL 62702, USA. <sup>3</sup>Department of Otolaryngology-Head and Neck Surgery, Stanford University School of Medicine, Stanford, CA 94305, USA. <sup>4</sup>Key Laboratory for Developmental Genes and Human Disease, Ministry of Education, Institute of Life Sciences, Southeast University, Nanjing 210096, China. <sup>5</sup>Universite Paris-Diderot, UFR Sciences du vivant, Paris 7, Paris, France. <sup>6</sup>Department of Anatomy and Neurobiology, University of Tennessee Health Science Center, Memphis, TN 38163, USA. <sup>7</sup>Virginia Merrill Bloedel Hearing Research Center, Department of Otolaryngology-Head and Neck Surgery, University of Washington School of Medicine, Seattle, WA, 98195-7923, USA.

\*These authors contributed equally to this work

‡Authors for correspondence (agcheng@stanford.edu; jian.zuo@stjude.org)

There was an error published in *Development* **141**, 816-829.

Edwin W. Rubel was omitted from the authorship of the paper. The correct author list and affiliations appears above.

In addition the Acknowledgements and Author contributions sections should read as follows.

### Acknowledgements

We thank L. Tong and R. Palmiter (University of Washington) for Pou4f3DTR/+ mice and discussion; S. Baker (St. Jude) for Atoh1-CreERTM mice and discussion; R. Kageyama (Kyoto University) for Hes5-nlsLacZ mice; P. Chambon (Institut Genetique Biologie Moleculaire Cellulaire) for the CreERT2 construct; S. Heller (Stanford University) for the anti-espina antibody and critical reading, J. Corwin, J. Burns and other members of the Corwin laboratory (University of Virginia) as well as members of our laboratories for discussion and critical comments; S. Connell, V. Frohlich, Y. Ouyang and J. Peters (St. Jude) for expertise in confocal imaging; A. Xue, V. Nookala, N. Pham, A. Vu, G. Huang and W. Liu (Stanford University) for excellent technical support; and L. Boykins (University of Memphis), R. Martens and J. Goodwin (University of Alabama) for assistance and expertise in scanning electron microscopy.

### Author contributions

B.C.C., R.C., E.W.R., A.G.C. and J.Z. developed the concepts or approach; B.C.C., R.C., A.L., Z.L., L.Z., D.-H.N., K.C., K.A.S., J.F., A.G.C. and J.Z. performed experiments or data analysis; B.C.C., R.C., A.G.C. and J.Z. prepared or edited the manuscript prior to submission.

The authors apologise to readers for this mistake.
